# Supplementary material for: Behavioral response of Panonychus citri (McGregor) (Acari: Tetranychidae) to synthetic chemicals and oils
Source: PeerJ. 2021 Apr 5;9:e10899. doi: 10.7717/peerj.10899 (PMC8029669; doi:10.7717/peerj.10899)
Supplement: Supplemental Information 1 — C.I. is the confidence interval for r (correlation co-efficient). [file peerj-09-10899-s001.xlsx]

## Sheet: Sheet1
		Leaf suurface	df = 7	LC30						LC50
			Acaricide	Toxicity vs Treated			Toxicity vs Un-treated			Toxicity vs Treated			Toxicity vs Un-treated
				r (95% C.I.)	t	P-value	r (95% C.I.)	t	P-value	r (95% C.I.)	t	P-value	r (95% C.I.)	t	P-value
		Adaxial (right)	SYP-9625	0.53(-0.21 - 0.88)	1.65	0.142	-0.32(-0.81 - 0.44)	-0.99	0.398	0.36(-0.40 - 0.83)	1.03	0.336	0.55(-0.17 - 0.89)	1.74	0.125
			Abamectin	-0.44(-0.85 - 0.32)	-1.28	0.24	-0.28(-0.80 - 0.47)	-0.78	0.46	-0.43(-0.85 - 0.33)	-1.25	0.251	-0.44(-0.86 - 0.31)	-1.31	0.231
			Vegetable oil	0.14(-0.58 - 0.74)	0.37	0.722	0.49(-0.26 - 0.87)	1.49	0.180	0.31(-0.45 - 0.81)	0.85	0.424	-0.29(-0.80 - 0.46)	-0.81	0.443
			EnSpray 99	-0.17(-0.75 - 0.55)	-0.46	0.662	-0.09(-0.71 - 0.61)	-0.25	0.813	0.18(-0.55 - 0.75)	0.47	0.650	-0.13(-0.73 - 0.59)	-0.34	0.746
		Adaxial (left)	SYP-9625	0.62(-0.06 - 0.91)	2.14	0.07	0.55(-0.63 - 0.69)	0.15	0.888	0.59(-0.12 - 0.90)	1.95	0.092	-0.21(-0.77 - 0.53)	-0.58	0.584
			Abamectin	0.26(-0.49 - 0.79)	0.71	0.502	-0.16(-0.66 - 0.66)	-4.22e-10	1	0.69(0.05 - 0.93)	2.54	0.0386	0.12(-0.59 - 0.73)	0.33	0.751
			Vegetable oil	0.07(-0.62 - 0.70)	0.18	0.860	-0.06(-0.69 - 0.63)	-0.16	0.875	0.49(-0.25 - 0.87)	1.51	0.176	-0.51(-0.87 - 0.24)	-1.56	0.163
			EnSpray 99	0.17(-0.56 - 0.75)	0.44	0.670	-0.08(-0.70 - 0.62)	-0.20	0.848	-0.12(-0.72 - 0.59)	-0.32	0.758	0.09(-0.61 - 0.81)	0.24	0.82
		Abaxial (right)	SYP-9625	-0.14(-0.74 - 0.58)	-0.37	0.719	-0.22(-0.77 - 0.52)	-0.59	0.575	NA	NA	NA	-0.09(-0.72 - 0.60)	-0.26	0.800
			Abamectin	-0.57(-0.90 - 0.15)	-1.85	0.106	0.11(-0.60 - 0.72)	0.29	0.784	NA	NA	NA	0.59(-0.13 - 0.90)	1.91	0.098
			Vegetable oil	-0.25(-0.78 - 0.50)	-0.68	0.516	0.10(-0.60 - 0.72)	0.27	0.789	0.49(-0.25 - 0.87)	1.51	0.176	1.97e-10(-0.66 - 0.66)	5.22e-10	1
			EnSpray 99	0.24(-0.50 - 0.78)	0.66	0.528	0.28(-0.47 - 0.80)	0.79	0.457	NA	NA	NA	-0.31(-0.81 - 0.45)	-0.86	0.416
		Abaxial (left)	SYP-9625	-0.13(-0.73 - 0.58)	-0.35	0.740	0.34(-0.42 - 0.82)	0.96	0.368	NA	NA	NA	0.34(-0.41 - 0.82)	0.97	0.364
			Abamectin	-0.08(-0.71 - 0.61)	-0.23	0.826	0.56(-0.16 - 0.89)	1.80	0.115	NA	NA	NA	0.23(-0.51 - 0.77)	0.63	0.547
			Vegetable oil	-0.24(-0.78 - 0.51)	-0.64	0.541	0.09(-0.61 - 0.71)	0.23	0.823	0.07(-0.62 - 0.70)	0.18	0.859	0.26(-0.48 - 0.79)	0.74	0.483
			EnSpray 99	0.76(0.20 - 0.95)	3.12	0.017	0.20(-0.53 - 0.76)	0.55	0.599	NA	NA	NA	-0.09(-0.71 - 0.61)	-0.24	0.813
