# Supplementary material for: Behavioral response of Panonychus citri (McGregor) (Acari: Tetranychidae) to synthetic chemicals and oils
Source: PeerJ. 2021 Apr 5;9:e10899. doi: 10.7717/peerj.10899 (PMC8029669; doi:10.7717/peerj.10899)
Supplement: Supplemental Information 2 — C.I. is the confidence interval for r (correlation coefficient). [file peerj-09-10899-s002.xlsx]

## Sheet: Sheet1
	Leaf suurface	df = 7	LC30						LC50
		Acaricide	Toxicity vs Treated			Toxicity vs Half-treated			Toxicity vs Treated			Toxicity vs Half-treated
			r (95% C.I.)	t	P-value	r (95% C.I.)	t	P-value	r (95% C.I.)	t	P-value	r (95% C.I.)	t	P-value
	Adaxial	SYP-9625	0.79(0.25 - 0.95)	3.36	0.012	0.54(-0.20 - 0.89)	1.69	0.136	0.71(0.09 - 0.93)	2.67	0.032	0.65(-0.02 - 0.91)	2.27	0.058
		Abamectin	0.91(0.63 - 0.98)	5.9	0	0.11(-0.60 - 0.72)	0.30	0.772	0.63(-0.07 - 0.91)	2.12	0.071	0.41(-0.35 - 0.84)	1.18	0.275
		Vegetable oil	0.33(0.42 - 0.82)	0.95	0.373	0.39(-0.37 - 0.84)	1.11	0.304	0.76(0.19 - 0.95)	3.07	0.018	0.70(0.06 - 0.93)	2.57	0.037
		EnSpray 99	0.91(0.62 - 0.98)	5.88	0.000	0.27(-0.48 - 0.79)	0.73	0.489	0.63(-0.06 - 0.91)	2.16	0.068	0.71(0.09 - 0.93)	2.68	0.032
	Abaxial	SYP-9625	0.54(-0.20 - 0.89)	1.69	0.135	0.71(0.09 - 0.93)	2.69	0.031	NA	NA	NA	0.83(0.38 - 0.96)	4.01	0.005
		Abamectin	0.82(0.34 - 0.96)	3.78	0.007	0.87(0.48 - 0.97)	4.63	0.002	NA	NA	NA	0.39(-0.37 - 0.84)	1.12	0.299
		Vegetable oil	0.15(-0.57 - 0.74)	0.40	0.699	0.30(-0.45 - 0.80)	0.84	0.429	0.87(0.50 - 0.97)	4.74	0.002	0.62(-0.07 - 0.91)	2.11	0.072
		EnSpray 99	0.73(0.14 - 0.94)	2.86	0.024	0.76(0.20 - 0.95)	3.11	0.017	NA	NA	NA	0.57(-0.15 - 0.89)	1.82	0.111
