# Supplementary material for: Behavioral response of Panonychus citri (McGregor) (Acari: Tetranychidae) to synthetic chemicals and oils
Source: PeerJ. 2021 Apr 5;9:e10899. doi: 10.7717/peerj.10899 (PMC8029669; doi:10.7717/peerj.10899)
Supplement: Supplemental Information 3 — C.I. is the confidence interval for r (correlation coefficient). [file peerj-09-10899-s003.xlsx]

## Sheet: Sheet1
			Leaf suurface	df = 7	LC30			LC50
				Acaricide	Toxicity vs Adaxial			Toxicity vs Abaxial
					r (95% C.I.)	t	P-value	r (95% C.I.)	t	P-value
			Adaxial	SYP-9625	0.48(-0.27 - 0.87)	1.44	0.194	0.46(-0.29 - 0.86)	1.38	0.21
				Abamectin	0.48(-0.27 - 0.87)	1.45	0.189	0.38(-0.38 - 0.83)	1.10	0.306
				Vegetable oil	0.71(0.09 - 0.93)	2.69	0.031	0.81(0.32 - 0.95)	3.68	0.008
				EnSpray 99	0.35(-0.41 - 0.82)	0.99	0.353	0.46(-0.30 - 0.86)	1.352	0.218
			Abaxial	SYP-9625	0.46(-0.29 - 0.86)	1.4	0.205	0.48(-0.27 - 0.87)	1.46	0.188
				Abamectin	0.46(-0.29 - 0.86)	1.39	0.21	0.46(-0.29 - 0.86)	1.38	0.21
				Vegetable oil	0.50(-0.24 - 0.87)	1.52	0.173	0.56(-0.17 - 0.89)	1.77	0.121
				EnSpray 99	0.28(-0.47 - 0.80)	0.77	0.47	0.48(-0.27 - 0.87)	1.46	0.188
