# Supplementary material for: Behavioral response of Panonychus citri (McGregor) (Acari: Tetranychidae) to synthetic chemicals and oils
Source: PeerJ. 2021 Apr 5;9:e10899. doi: 10.7717/peerj.10899 (PMC8029669; doi:10.7717/peerj.10899)
Supplement: Supplemental Information 4 — Includes LC30, LC50 and toxicity raw result. [file peerj-09-10899-s004.xlsx]

## Sheet: LC30
		Adaxial Right									Adaxial Left											Abaxial Right											Abaxial Left												Treat vs half (Adaxial)
		SYP-9625	Abamectin	Plant Oil	Mineral Oil	Control					SYP-9625	Abamectin	Plant Oil	Mineral Oil	Control							SYP-9625	Abamectin	Plant Oil	Mineral Oil	Control							SYP-9625	Abamectin	Plant Oil	Mineral Oil	Control								SYP-9625	Abamectin	Plant Oil	Mineral Oil	Control
	Treated	5.33	6.11	7.22	7.22	8.78				Treated	2.67	3.33	2.22	2.11	3.67						Treated	0.67	0.33	0.67	0.78	1.33						Treated	0.22	0.11	0.111	0.33	1.667							Half-treated	6.33	7.33	7.17	6.67	7.17
	Un-Treated	14.56	13.78	18	15.33	10.33	Treated	Un-treated		Un-Treated	8.67	9.11	6.44	6.44	6.44	Treated	Un-treated				Un-Treated	1.67	2.22	1.78	2.67	2.78	Treated	Un-treated				Un-Treated	2.22	3.22	2.11	2.67	2.67	Treated	Un-treated					Treated	3.5	3.33	2.833	3.83	4.5
	F-value	30.89	70.01	84.01	33.46	3.14	3.37	7.41		F-value	11.89	39.47	5.64	15.89	8.65	1.67	1.18				F-value	1.89	46.24	2.65	10.91	5.08	1.2	1				F-value	16.83	19.12	24.45	13.07	4	17.05	0.67					F-value	3.22	2.72	7.86	2	3.12
	DF	1,17	1,17	1,17	1,17	1,17	4,44	4,44		DF	1,17	1,17	1,17	1,17	1,17	4,44	4,44				DF	1,17	1,17	1,17	1,17	1,17	4,44	4,44				DF	1,17	1,17	1,17	1,17	1,17	4,44	4,44					DF	1,11	1,11	1,11	1,11	1,11
	P-value	0	0	0	0	0.097	0.018	0		P-value	0.003\0.006	0	0.030/0.042	0.001/0.002	0.010/0.015	0.176	0.335				P-value	0.188/0.192	0	0.123/0.13	0.004/0.005	0.039/0.041	0.325	0.416				P-value	0.001/0.003	000/0.002	0/0.001	0.002/0.006	0.063/0.069	0	0.616					P-value	0.103/0.133	0.13/0.15	0.019/0.038	0.187/0.207	0.108/0.111
	T-value	-5.56	-8.37	-9.17	-5.78	-1.77				T-value	-3.45	-6.28	-2.37	-3.99	-2.94						T-value	-1.38	-6.8	-1.63	-3.3	-2.25						T-value	-4.1	-4.37	-4.94	-3.61	-2							T-value	1.79	1.65	2.8	1.42	1.77
	DF	12	14	15	11	15				DF	10	15	9	12	10						DF	13	14	12	15	14						DF	9	8	9	9	12							DF	5	6	5	6	9
	difference	-9.22	-7.667	-10.78	-8.11	-1.556				difference	-6	-5.778	-4.22	-4.33	-2.778						difference	-1	-1.889	-1.11	-1.889	-1.444						difference	-2	-3.11	-2	-2.33	-1							difference	2.83	4	4.33	2.83	2.67
	SE	0.78	0.51	0.89	0.64	0.66				SE	0.6	0.65	0.49	0.51	0.33						SE	0.37	0.17	0.33	0.36	0.37						SE	0.15	0.11	0.11	0.17	0.24							SE	1.5	2.3	1.5	1.8	0.87
		1.5	0.76	0.76	1.2	0.58					1.5	0.65	1.7	0.96	0.88							0.62	0.2	0.6	0.44	0.52							0.46	0.7	0.39	0.62	0.44								0.34	0.76	0.4	0.79	1.2
		SYP-9625	Abamectin	Plant Oil	Mineral Oil	Control					SYP-9625	Abamectin	Plant Oil	Mineral Oil	Control							SYP-9625	Abamectin	Plant Oil	Mineral Oil	Control						Abaxial Left	SYP-9625	Abamectin	Plant Oil	Mineral Oil	Control							TH Ada	SYP-9625	Abamectin	Plant Oil	Mineral Oil	Control
	Treated	10	7	8	6	9				Treated	5	6	4	4	4						Treated	0	0	0	1	1						Treated	1	1	1	0	2							Treated	5	5	3	7	9
	Treated	5	9	9	9	12				Treated	2	4	1	2	3						Treated	2	1	2	2	1						Treated	0	0	0	1	1							Treated	3	2	2	3	2
	Treated	3	7	5	7	9				Treated	3	1	2	1	2						Treated	0	0	0	0	3						Treated	0	0	0	1	1							Treated	4	5	4	5	7
	Treated	7	6	6	7	8				Treated	6	5	5	3	5						Treated	0	0	0	0	1						Treated	1	0	0	0	3							Treated	3	2	2	2	2
	Treated	6	7	8	11	9				Treated	1	3	1	1	3						Treated	3	1	2	3	0						Treated	0	0	0	0	2							Treated	3	5	4	4	5
	Treated	2	4	4	7	8				Treated	2	1	1	1	5						Treated	0	0	0	0	3						Treated	0	0	0	0	1							Treated	3	1	2	2	2
	Treated	5	5	6	5	8				Treated	3	5	3	5	4						Treated	0	0	0	0	1						Treated	0	0	0	0	2							Half-Treated	3	2	3	3	4
	Treated	6	5	13	8	11				Treated	1	4	1	1	3						Treated	1	1	2	1	0						Treated	0	0	0	0	2							Half-Treated	11	13	9	11	9
	Treated	4	5	6	5	5				Treated	1	1	2	1	4						Treated	0	0	0	0	2						Treated	0	0	0	1	1							Half-Treated	3	3	4	2	6
	Un-Treated	20	12	15	12	10				Un-Treated	5	8	2	4	5						Un-Treated	1	2	4	3	4						Un-Treated	3	4	3	3	3							Half-Treated	10	14	12	12	10
	Un-Treated	19	13	19	14	12				Un-Treated	7	9	3	3	3						Un-Treated	3	2	1	3	3						Un-Treated	2	2	2	5	1							Half-Treated	3	2	5	3	7
	Un-Treated	15	14	21	19	11				Un-Treated	15	11	15	8	11						Un-Treated	1	3	1	2	2						Un-Treated	1	3	1	1	4							Half-Treated	8	10	10	9	7
	Un-Treated	9	14	18	15	8				Un-Treated	4	6	1	6	4						Un-Treated	1	3	3	1	5						Un-Treated	4	6	3	4	3
	Un-Treated	8	17	18	18	13				Un-Treated	8	11	6	4	6						Un-Treated	4	1	1	2	3						Un-Treated	2	1	3	3	1								TH adaT	mites		TH adaHT	mites
	Un-Treated	18	16	16	15	9				Un-Treated	18	9	13	9	9						Un-Treated	0	2	1	1	1						Un-Treated	1	3	1	0	4								SYP	5		SYP	3
	Un-Treated	15	10	21	10	9				Un-Treated	4	7	2	5	6						Un-Treated	0	2	5	4	4						Un-Treated	4	7	3	4	3								SYP	3		SYP	11
	Un-Treated	12	12	19	13	12				Un-Treated	7	12	6	7	5						Un-Treated	5	2	0	5	3						Un-Treated	3	1	3	4	1								SYP	4		SYP	3
	Un-Treated	14	16	15	22	9				Un-Treated	10	9	10	12	9						Un-Treated	0	3	0	3	0						Un-Treated	0	2	0	0	4								SYP	3		SYP	10
																																													SYP	3		SYP	3
	ADRt	mites		ADRu	mites						ADRt	mites		ADRu	mites							ADRt	mites		ADRu	mites							Abaxial leftT	mites		Abaxial LU	mites								SYP	3		SYP	8
	SYP	10		SYP	21						SYP	5		SYP	5							SYP	0		SYP	1							SYP	1		SYP	3								ABA	5		ABA	2
	SYP	5		SYP	19						SYP	2		SYP	7							SYP	2		SYP	3							SYP	0		SYP	2								ABA	2		ABA	13
	SYP	3		SYP	15						SYP	3		SYP	15							SYP	0		SYP	1							SYP	0		SYP	1								ABA	5		ABA	3
	SYP	7		SYP	9						SYP	6		SYP	4							SYP	0		SYP	1							SYP	1		SYP	4								ABA	2		ABA	14
	SYP	6		SYP	8						SYP	1		SYP	8							SYP	3		SYP	4							SYP	0		SYP	2								ABA	5		ABA	2
	SYP	2		SYP	18						SYP	2		SYP	18							SYP	0		SYP	0							SYP	0		SYP	1								ABA	1		ABA	10
	SYP	5		SYP	15						SYP	3		SYP	4							SYP	0		SYP	0							SYP	0		SYP	4								PO	3		PO	3
	SYP	6		SYP	12						SYP	1		SYP	7							SYP	1		SYP	5							SYP	0		SYP	3								PO	2		PO	9
	SYP	4		SYP	14						SYP	1		SYP	10							SYP	0		SYP	0							SYP	0		SYP	0								PO	4		PO	4
	ABA	7		ABA	12						ABA	6		ABA	8							ABA	0		ABA	2							ABA	1		ABA	4								PO	2		PO	12
	ABA	9		ABA	13						ABA	4		ABA	9							ABA	1		ABA	2							ABA	0		ABA	2								PO	4		PO	5
	ABA	7		ABA	14						ABA	1		ABA	11							ABA	0		ABA	3							ABA	0		ABA	3								PO	2		PO	10
	ABA	6		ABA	14						ABA	5		ABA	6							ABA	0		ABA	3							ABA	0		ABA	6								MO	7		MO	3
	ABA	7		ABA	17						ABA	3		ABA	11							ABA	1		ABA	1							ABA	0		ABA	1								MO	3		MO	11
	ABA	4		ABA	16						ABA	1		ABA	9							ABA	0		ABA	2							ABA	0		ABA	3								MO	5		MO	2
	ABA	5		ABA	10						ABA	5		ABA	7							ABA	0		ABA	2							ABA	0		ABA	7								MO	2		MO	12
	ABA	5		ABA	12						ABA	4		ABA	12							ABA	1		ABA	2							ABA	0		ABA	1								MO	4		MO	3
	ABA	5		ABA	16						ABA	1		ABA	9							ABA	0		ABA	3							ABA	0		ABA	2								MO	2		MO	9
	PO	8		PO	15						PO	4		PO	2							PO	0		PO	4							PO	1		PO	3								CO	9		CO	4
	PO	9		PO	19						PO	1		PO	3							PO	2		PO	1							PO	0		PO	2								CO	2		CO	9
	PO	5		PO	21						PO	2		PO	15							PO	0		PO	1							PO	0		PO	1								CO	7		CO	6
	PO	6		PO	18						PO	5		PO	1							PO	0		PO	3							PO	0		PO	3								CO	2		CO	10
	PO	8		PO	18						PO	1		PO	6							PO	2		PO	1							PO	0		PO	3								CO	5		CO	7
	PO	4		PO	16						PO	1		PO	13							PO	0		PO	1							PO	0		PO	1								CO	2		CO	7
	PO	6		PO	21						PO	3		PO	2							PO	0		PO	5							PO	0		PO	3
	PO	13		PO	19						PO	1		PO	6							PO	2		PO	0							PO	0		PO	3
	PO	6		PO	15						PO	2		PO	10							PO	0		PO	0							PO	0		PO	0
	MO	6		MO	12						MO	4		MO	4							MO	1		MO	3							MO	0		MO	3
	MO	9		MO	14						MO	2		MO	3							MO	2		MO	3							MO	1		MO	5
	MO	7		MO	19						MO	1		MO	8							MO	0		MO	2							MO	1		MO	1
	MO	7		MO	15						MO	3		MO	6							MO	0		MO	1							MO	0		MO	4
	MO	11		MO	18						MO	1		MO	4							MO	3		MO	2							MO	0		MO	3
	MO	7		MO	15						MO	1		MO	9							MO	0		MO	1							MO	0		MO	0
	MO	5		MO	10						MO	5		MO	5							MO	0		MO	4							MO	0		MO	4
	MO	8		MO	13						MO	1		MO	7							MO	1		MO	5							MO	0		MO	4
	MO	5		MO	22						MO	1		MO	12							MO	0		MO	3							MO	1		MO	0
	CO	9		CO	10						CO	4		CO	5							CO	1		CO	4							CO	2		CO	3
	CO	12		CO	12						CO	3		CO	3							CO	1		CO	3							CO	1		CO	1
	CO	9		CO	11						CO	2		CO	11							CO	3		CO	2							CO	1		CO	4
	CO	8		CO	8						CO	5		CO	4							CO	1		CO	5							CO	3		CO	3
	CO	9		CO	13						CO	3		CO	6							CO	0		CO	3							CO	2		CO	1
	CO	8		CO	9						CO	5		CO	9							CO	3		CO	1							CO	1		CO	4
	CO	8		CO	9						CO	4		CO	6							CO	1		CO	4							CO	2		CO	3
[truncated: 18 more columns]

## Sheet: LC50
		Adaxial Right									Adaxial Left											Abaxial Right											Abaxial Left												Treat vs half (Adaxial)
		SYP-9625	Abamectin	Plant Oil	Mineral Oil	Control					SYP-9625	Abamectin	Plant Oil	Mineral Oil	Control							SYP-9625	Abamectin	Plant Oil	Mineral Oil	Control							SYP-9625	Abamectin	Plant Oil	Mineral Oil	Control								SYP-9625	Abamectin	Plant Oil	Mineral Oil	Control
	Treated	1.78	1.778	5	2.11	8.78				Treated	0.667	1	1.67	1	3.67						Treated	0	0	1	0	1.33						Treated	0	0	1.222	0	1.667							Treated	0.333	0.5	1.333	0.667	4.5
	Un-Treated	11.67	13.89	13.33	13.56	10.33	Treated	Un-treated		Un-Treated	10.89	8.78	6.33	10.11	6.44	Treated	Un-treated				Un-Treated	5.44	6.78	4.22	5.44	2.78	Treated	Un-treated				Un-Treated	4.33333	3.88889	4.56	3.66667	2.67	Treated	Un-treated					Half-treated	8.83	9.67	7.5	9.17	7.17
	F-value	178	432.04	41.67	177.56	3.14	28.01	4.74		F-value	76.08	28	14.25	22.74	8.65	14.67	2.37				F-value	55.84	69.55	17.99	88.11	5.08	10.86	4.89				F-value	15.02	33.11	23.68	20.17	4	29.78	0.9					F-value	76.95	110.4	88.9	56.79	3.12
	DF	1,17	1,17	1,17	1,17	1,17	4,44	4,44		DF	1,17	1,17	1,17	1,17	1,17	4,44	4,44				DF	1,17	1,17	1,17	1,17	1,17	4,44	4,44				DF	1,17	1,17	1,17	1,17	1,17	4,44	4,44					DF	1,11	1,11	1,11	1,11	1,11
	P-value	0	0	0	0	0.096/0.097	0	0.003		P-value	0	0/0.001	0.002/0.004	0/0.001	0.010/0.015	0	0.068				P-value	0	0	0.001/0.002	0	0.039/0.041	0	0.003				P-value	0.001	0	0/0.001	0	0.063/0.069	0	0.47					P-value	0/0	0/0	0/0	0/0.001	0.108/0.111
	T-value	-13.34	-20.79	-6.45	-13.33	-1.77				T-value	-8.72	-5.29	-3.78	-4.77	-2.94						T-value			-4.24		-2.25						T-value			-4.87		-2							T-value	8.77	10.51	9.43	7.54	1.77
	DF	15	13	12	15	15				DF	9	8	9	8	10						DF			9		14						DF			9		12							DF	5	5	6	5	9
	difference	-9.889	-12.11	-8.33	-11.444	-1.556				difference	-10.22	-7.78	-4.67	-9.11	-2.778						difference			-3.222		-1.444						difference			-3.33		-1							difference	8.5	9.167	6.167	8.5	2.67
	SE	0.52	0.32	0.65	0.65	0.68				SE	0.29	0.29	0.37	0.29	0.33						SE	0	0	0.24	0	0.37						SE	0	0	0.22	0	0.24							SE	0.21	0.22	0.21	0.33	1.2
		0.53	0.48	1.1	0.56	0.55					1.1	1.4	1.2	1.9	0.88							0.728604	0.812708	0.722222	0.580017	0.521157							1.11803	0.675863	0.65	0.816497	0.44								0.95	0.84	0.62	1.1	0.87
	Adaxial right	SYP-9625	Abamectin	Plant Oil	Mineral Oil	Control				Adaxial Left	SYP-9625	Abamectin	Plant Oil	Mineral Oil	Control						Abaxial right	SYP-9625	Abamectin	Plant Oil	Mineral Oil	Control						Abxial left	SYP-9625	Abamectin	Plant Oil	Mineral Oil	Control							TvsHTada	SYP-9625	Abamectin	Plant Oil	Mineral Oil	Control
	Treated	1	2	5	1	9				Treated	2	2	3	2	4						Treated	0	0	1	0	1						Treated	0	0	2	0	2							Treated	1	1	1	1	9
	Treated	3	3	7	4	12				Treated	0	0	1	0	3						Treated	0	0	1	0	1						Treated	0	0	1	0	1							Treated	0	0	1	0	2
	Treated	1	2	6	1	9				Treated	1	1	1	1	2						Treated	0	0	2	0	3						Treated	0	0	2	0	1							Treated	1	1	2	2	7
	Treated	1	1	3	1	8				Treated	2	2	2	2	5						Treated	0	0	1	0	1						Treated	0	0	1	0	3							Treated	0	0	1	0	2
	Treated	5	2	8	5	9				Treated	0	0	1	0	3						Treated	0	0	1	0	0						Treated	0	0	1	0	2							Treated	0	1	2	1	5
	Treated	1	2	4	1	8				Treated	0	1	1	1	5						Treated	0	0	1	0	3						Treated	0	0	1	0	1							Treated	0	0	1	0	2
	Treated	1	1	4	0	8				Treated	1	2	3	2	4						Treated	0	0	0	0	1						Treated	0	0	2	0	2							Half-Treated	6	8	6	6	4
	Treated	3	3	6	5	11				Treated	0	0	0	0	3						Treated	0	0	0	0	0						Treated	0	0	0	0	2							Half-Treated	11	10	8	11	9
	Treated	0	0	2	1	5				Treated	0	1	3	1	4						Treated	0	0	2	0	2						Treated	0	0	1	0	1							Half-Treated	8	7	7	9	6
	Un-Treated	11	15	18	14	10				Un-Treated	7	4	3	3	5						Un-Treated	7	9	5	8	4						Un-Treated	8	5	7	6	3							Half-Treated	9	12	6	12	10
	Un-Treated	9	15	17	12	12				Un-Treated	13	15	11	18	3						Un-Treated	6	5	2	6	3						Un-Treated	0	2	3	1	1							Half-Treated	7	9	8	6	7
	Un-Treated	10	16	11	15	11				Un-Treated	16	8	7	11	11						Un-Treated	4	8	5	4	2						Un-Treated	5	5	4	3	4							Half-Treated	12	12	10	11	7
	Un-Treated	13	13	15	16	8				Un-Treated	6	5	3	5	4						Un-Treated	5	7	3	6	5						Un-Treated	7	6	5	5	3								0.945751	0.843274	0.619139	1.07755	0.872417
	Un-Treated	11	12	16	14	13				Un-Treated	11	16	9	15	6						Un-Treated	3	3	2	5	3						Un-Treated	0	2	2	1	1								TvsHTada-T	mites		TvsHTada-HT	mites
	Un-Treated	12	13	9	13	9				Un-Treated	10	6	8	12	9						Un-Treated	5	9	4	3	1						Un-Treated	6	4	6	4	4								SYP	1		SYP	6
	Un-Treated	13	14	12	12	9				Un-Treated	8	6	0	2	6						Un-Treated	10	10	5	8	4						Un-Treated	6	7	7	8	3								SYP	0		SYP	11
	Un-Treated	14	15	13	11	12				Un-Treated	14	11	8	10	5						Un-Treated	6	4	3	4	3						Un-Treated	0	1	2	1	1								SYP	1		SYP	8
	Un-Treated	12	12	9	15	9				Un-Treated	13	8	8	15	9						Un-Treated	3	6	9	5	0						Un-Treated	7	3	5	4	4								SYP	0		SYP	9
																						0.728604	0.812708	0.722222	0.580017	0.521157							4.33333	3.88889	4.55556	3.66667	2.66667								SYP	0		SYP	7
	ADRt	mites		ADRu	mites						ADLt	mites		ADLu	mites							Abaxial Rt	mites		Abaxial Ru	mites							Abaxial LT	mites		Abaxial LU	mites								SYP	0		SYP	12
	SYP	1		SYP	11						SYP	2		SYP	7							SYP	0		SYP	7							SYP	0		SYP	8								ABA	1		ABA	8
	SYP	3		SYP	9						SYP	0		SYP	13							SYP	0		SYP	6							SYP	0		SYP	0								ABA	0		ABA	10
	SYP	1		SYP	10						SYP	1		SYP	16							SYP	0		SYP	4							SYP	0		SYP	5								ABA	1		ABA	7
	SYP	1		SYP	13						SYP	2		SYP	6							SYP	0		SYP	5							SYP	0		SYP	7								ABA	0		ABA	12
	SYP	5		SYP	11						SYP	0		SYP	11							SYP	0		SYP	3							SYP	0		SYP	0								ABA	1		ABA	9
	SYP	1		SYP	12						SYP	0		SYP	10							SYP	0		SYP	5							SYP	0		SYP	6								ABA	0		ABA	12
	SYP	1		SYP	13						SYP	1		SYP	8							SYP	0		SYP	10							SYP	0		SYP	6								PO	1		PO	6
	SYP	3		SYP	14						SYP	0		SYP	14							SYP	0		SYP	6							SYP	0		SYP	0								PO	1		PO	8
	SYP	0		SYP	12						SYP	0		SYP	13							SYP	0		SYP	3							SYP	0		SYP	7								PO	2		PO	7
	ABA	2		ABA	15						ABA	2		ABA	4							ABA	0		ABA	9							ABA	0		ABA	5								PO	1		PO	6
	ABA	3		ABA	15						ABA	0		ABA	15							ABA	0		ABA	5							ABA	0		ABA	2								PO	2		PO	8
	ABA	2		ABA	16						ABA	1		ABA	8							ABA	0		ABA	8							ABA	0		ABA	5								PO	1		PO	10
	ABA	1		ABA	13						ABA	2		ABA	5							ABA	0		ABA	7							ABA	0		ABA	6								MO	1		MO	6
	ABA	2		ABA	12						ABA	0		ABA	16							ABA	0		ABA	3							ABA	0		ABA	2								MO	0		MO	11
	ABA	2		ABA	13						ABA	1		ABA	6							ABA	0		ABA	9							ABA	0		ABA	4								MO	2		MO	9
	ABA	1		ABA	14						ABA	2		ABA	6							ABA	0		ABA	10							ABA	0		ABA	7								MO	0		MO	12
	ABA	3		ABA	15						ABA	0		ABA	11							ABA	0		ABA	4							ABA	0		ABA	1								MO	1		MO	6
	ABA	0		ABA	12						ABA	1		ABA	8							ABA	0		ABA	6							ABA	0		ABA	3								MO	0		MO	11
	PO	5		PO	18						PO	3		PO	3							PO	1		PO	5							PO	2		PO	7								CO	9		CO	4
	PO	7		PO	17						PO	1		PO	11							PO	1		PO	2							PO	1		PO	3								CO	2		CO	9
	PO	6		PO	11						PO	1		PO	7							PO	2		PO	5							PO	2		PO	4								CO	7		CO	6
	PO	3		PO	15						PO	2		PO	3							PO	1		PO	3							PO	1		PO	5								CO	2		CO	10
	PO	8		PO	16						PO	1		PO	9							PO	1		PO	2							PO	1		PO	2								CO	5		CO	7
	PO	4		PO	9						PO	1		PO	8							PO	1		PO	4							PO	1		PO	6								CO	2		CO	7
	PO	4		PO	12						PO	3		PO	0							PO	0		PO	5							PO	2		PO	7
	PO	6		PO	13						PO	0		PO	8							PO	0		PO	3							PO	0		PO	2
	PO	2		PO	9						PO	3		PO	8							PO	2		PO	9							PO	1		PO	5
	MO	1		MO	14						MO	2		MO	3							MO	0		MO	8							MO			MO	6
	MO	4		MO	12						MO	0		MO	18							MO	0		MO	6							MO	0		MO	1
	MO	1		MO	15						MO	1		MO	11							MO	0		MO	4							MO	0		MO	3
	MO	1		MO	16						MO	2		MO	5							MO	0		MO	6							MO	0		MO	5
	MO	5		MO	14						MO	0		MO	15							MO	0		MO	5							MO	0		MO	1
	MO	1		MO	13						MO	1		MO	12							MO	0		MO	3							MO	0		MO	4
	MO	0		MO	12						MO	2		MO	2							MO	0		MO	8							MO	0		MO	8
	MO	5		MO	11						MO	0		MO	10							MO	0		MO	4							MO	0		MO	1
	MO	1		MO	15						MO	1		MO	15							MO	0		MO	5							MO	0		MO	4
	CO	9		CO	10						CO	4		CO	5							CO	1		CO	4							CO	2		CO	3
	CO	12		CO	12						CO	3		CO	3							CO	1		CO	3							CO	1		CO	1
	CO	9		CO	11						CO	2		CO	11							CO	3		CO	2							CO	1		CO	4
	CO	8		CO	8						CO	5		CO	4							CO	1		CO	5							CO	3		CO	3
	CO	9		CO	13						CO	3		CO	6							CO	0		CO	3							CO	2		CO	1
	CO	8		CO	9						CO	5		CO	9							CO	3		CO	1							CO	1		CO	4
	CO	8		CO	9						CO	4		CO	6							CO	1		CO	4							CO	2		CO	3
	CO	11		CO	12						CO	3		CO	5							CO	0		CO	3							CO	2		CO	1
	CO	5		CO	9						CO	4		CO	9							CO	2		CO	0							CO	1		CO	4
[truncated: 18 more columns]

## Sheet: Toxicity
	Exp.1	SYP-9625	Abamectin	Plant Oil	Mineral Oil		Exp.5	SYP-9625	Abamectin	Plant Oil	Mineral Oil
	LC30	5	1	2	4		LC30	2	3	2	1
	LC30	3	0	3	4		LC30	2	2	1	1
	LC30	3	1	2	3		LC30	2	2	2	2
	LC50	4	3	5	2		LC50	2	5	1	2
	LC50	2	1	3	5		LC50	4	3	1	3
	LC50	3	2	4	4		LC50	2	3	1	2
	Exp.2	SYP-9625	Abamectin	Plant Oil	Mineral Oil		Exp.6	SYP-9625	Abamectin	Plant Oil	Mineral Oil
	LC30	0	1	0	2		LC30	3	2	2	0
	LC30	0	0	0	3		LC30	1	0	0	0
	LC30	0	1	0	2		LC30	1	1	0	0
	LC50	1	0	1	2		LC50	2	1	2	3
	LC50	1	2	0	3		LC50	2	1	1	2
	LC50	0	1	1	3		LC50	3	2	3	1
	Exp.3	SYP-9625	Abamectin	Plant Oil	Mineral Oil		Exp.7	SYP-9625	Abamectin	Plant Oil	Mineral Oil
	LC30	3	0	0	0		LC30	3	4	2	4
	LC30	2	0	0	0		LC30	5	2	3	2
	LC30	3	0	0	0		LC30	4	3	1	2
	LC50	3	2	1	0		LC50	6	6	3	2
	LC50	4	2	1	0		LC50	5	4	4	4
	LC50	4	1	0	0		LC50	5	5	4	6
	Exp.4	SYP-9625	Abamectin	Plant Oil	Mineral Oil		Exp.8	SYP-9625	Abamectin	Plant Oil	Mineral Oil
	LC30	2	1	0	0		LC30	1	1	1	2
	LC30	1	1	0	0		LC30	3	2	0	2
	LC30	2	0	0	0		LC30	2	1	0	0
	LC50	5	3	2	3		LC50	2	2	2	2
	LC50	3	1	1	2		LC50	3	1	2	1
	LC50	4	2	0	3		LC50	2	0	1	2
				Exp.9	SYP-9625	Abamectin	Plant Oil	Mineral Oil
				LC30	14	4	4	2
				LC30	9	3	2	0
				LC30	9	4	2	2
				LC50	11	5	4	2
				LC50	15	6	3	3
				LC50	11	9	3	2
